# Supplementary material
Source: PubMed Central journal article supplement (PMC2761362)
Supplement: 0906095106_0906095106SI.pdf [file 0906095106_0906095106SI.pdf]

# Supporting Information

Li et al. 10.1073/pnas.0906095106

SI Text

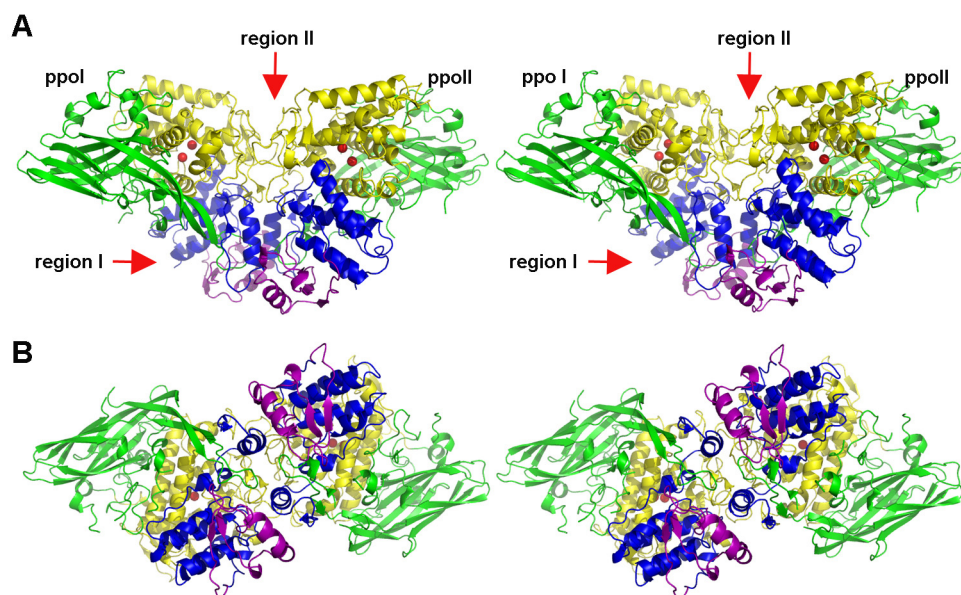

**Fig. S1.** Dimer interface of *M. sexta* PPO. The heterodimeric PPO is formed in a back-to-back mode. The secondary structures are colored differently according to individual domains: pro-region, purple; domain I, blue; domain II, yellow; domain III, green. The di-copper atoms are located in domain II and are shown as red spheres. There are 2 regions at the dimer interface, as indicated by the red arrow. Region I interactions involve mainly the pro-region, domain I, and domain III. Region II interactions predominantly involve domain II. (A) Stereo side view. (B) Stereo top view along the pseudo-2-fold axis.

**Table S1. Data and statistics**

| Crystal data                             |                                                                       |
|------------------------------------------|-----------------------------------------------------------------------|
| Beam-line                                | 19-ID APS                                                             |
| Wavelength, Å                            | 1.07177                                                               |
| Space group                              | P 2 <sub>1</sub> 2 <sub>1</sub> 2                                     |
| Cell constants                           | a = 148.8 Å, b = 153.7 Å, c = 75.8 Å, α = 90.0°, β = 90.0°, γ = 90.0° |
| Resolution, Å                            | 1.97                                                                  |
| Total reflections                        | 976,846                                                               |
| Unique reflections                       | 117,346                                                               |
| Completeness                             | 100.0 (100.0%)                                                        |
| I/S                                      | 27.8 (2.3)                                                            |
| R <sub>sym</sub>                         | 7.4 (79.4%)                                                           |
| Refinement statistics                    |                                                                       |
| Reflection range used, Å                 | 1.97–50.0                                                             |
| No. reflections used                     | 115,234                                                               |
| R <sub>work</sub> /R <sub>free</sub> , % | 15.4/19.4                                                             |
| rmsd bonds, Å                            | 0.016                                                                 |
| rmsd angle, °                            | 1.516                                                                 |
| No. atoms/average B, Å <sup>2</sup>      |                                                                       |
| Protein                                  | 10,803                                                                |
| Metal ions                               | 4                                                                     |
| Waters                                   | 1,225                                                                 |
| Ramachandran plot (preferred/allowed), % | 96.87/3.13                                                            |

$$R_{sym} = \sum |I_{obs} - I_{avg}| / \sum I_{avg}; R_{work} = \sum |F_{obs} - F_{calc}| / \sum F_{obs}$$

*R<sub>free</sub> was calculated using 5% data.*

APS, Advanced Photon Source; I/S, Intensity/Sigma(Intensity). Values in parentheses are for the highest-resolution shell.
